# Supplementary material for: Investigation of Fe3O4@boehmite NPs as efficient and magnetically recoverable nanocatalyst in the homoselective synthesis of tetrazoles
Source: Royal Society of Chemistry journal article supplement (doi:10.1039/d2ra04759d), 2022-01-01

## Supplementary Data

### Investigation of Fe<sub>3</sub>O<sub>4</sub>@boehmite NPs as efficient and magnetically recoverable nanocatalyst in the homoselective synthesis of tetrazoles

Parisa Moradi\*

Department of Chemistry, Faculty of Science, Ilam University, P. O. Box69315516, Ilam, Iran. ; E-mail address: parisam28@yahoo.com

#### Abstract:

Magnetic boehmite nanoparticles (Fe<sub>3</sub>O<sub>4</sub>@boehmite NPs) were synthesized from a hybrid of boehmite and Fe<sub>3</sub>O<sub>4</sub> nanoparticles. At first, boehmite nanoparticles (aluminum oxide hydroxide) were prepared *via* a simple procedure in water using commercially available materials such as sodium hydroxide and aluminum nitrate. Then, these nanoparticles were magnetized using Fe<sub>3</sub>O<sub>4</sub> NPs in a basic solution of FeCl<sub>2</sub>.4H<sub>2</sub>O and FeCl<sub>3</sub>.6H<sub>2</sub>O. Fe<sub>3</sub>O<sub>4</sub>@boehmite NPs have advantages of both boehmite nanoparticles and Fe<sub>3</sub>O<sub>4</sub> magnetic materials. Magnetic boehmite nanoparticles have been characterized by various techniques such as TEM, SEM, EDS, WDX, ICP, FT-IR, Raman, XRD and VSM. SEM and TEM images confirmed that particles size are less than 50 nm in diameter with a cubic orthorhombic structure. Then, Fe<sub>3</sub>O<sub>4</sub>@boehmite NPs were applied as a homoselective, highly efficient, cheap, biocompatibility, heterogeneous and magnetically recoverable nanocatalyst in the synthesis of 5-substituted 1H-tetrazole derivatives. Fe<sub>3</sub>O<sub>4</sub>@boehmite NPs can be recycled for several runs in the synthesis of tetrazoles. Also, all tetrazoles were isolated in high yields, which reveals high activity of Fe<sub>3</sub>O<sub>4</sub>@boehmite NPs in the synthesis of tetrazole derivatives. Fe<sub>3</sub>O<sub>4</sub>@boehmite NPs shows a good homoselectivity in synthesis of 5-substituted 1H-tetrazole derivatives.

---

\* Address correspondence to P. Moradi, Department of Chemistry, Ilam University, P.O. Box 69315516, Ilam, Iran; Tel/Fax: +98 841 2227022; E-mail address: [parisam28@yahoo.com](mailto:parisam28@yahoo.com) or [p.moradi@ilam.ac.ir](mailto:p.moradi@ilam.ac.ir)

## <sup>1</sup>H NMR spectral data

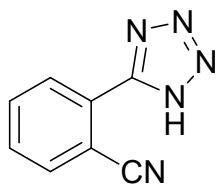

2-(1H-tetrazol-5-yl)benzonitrile

<sup>1</sup>H NMR (400 MHz, CDCl<sub>3</sub>): δ<sub>H</sub> = 8.11-8.06 (t, *J* = 8 Hz, 2H), 7.96-7.90 (t, *J* = 12 Hz, 1H), 7.81-7.75 (t, *J* = 20 Hz, 1H)ppm.

NMR/1 فتالونیتریل/1 همان دی سیانو تترازول — Moradi(10)

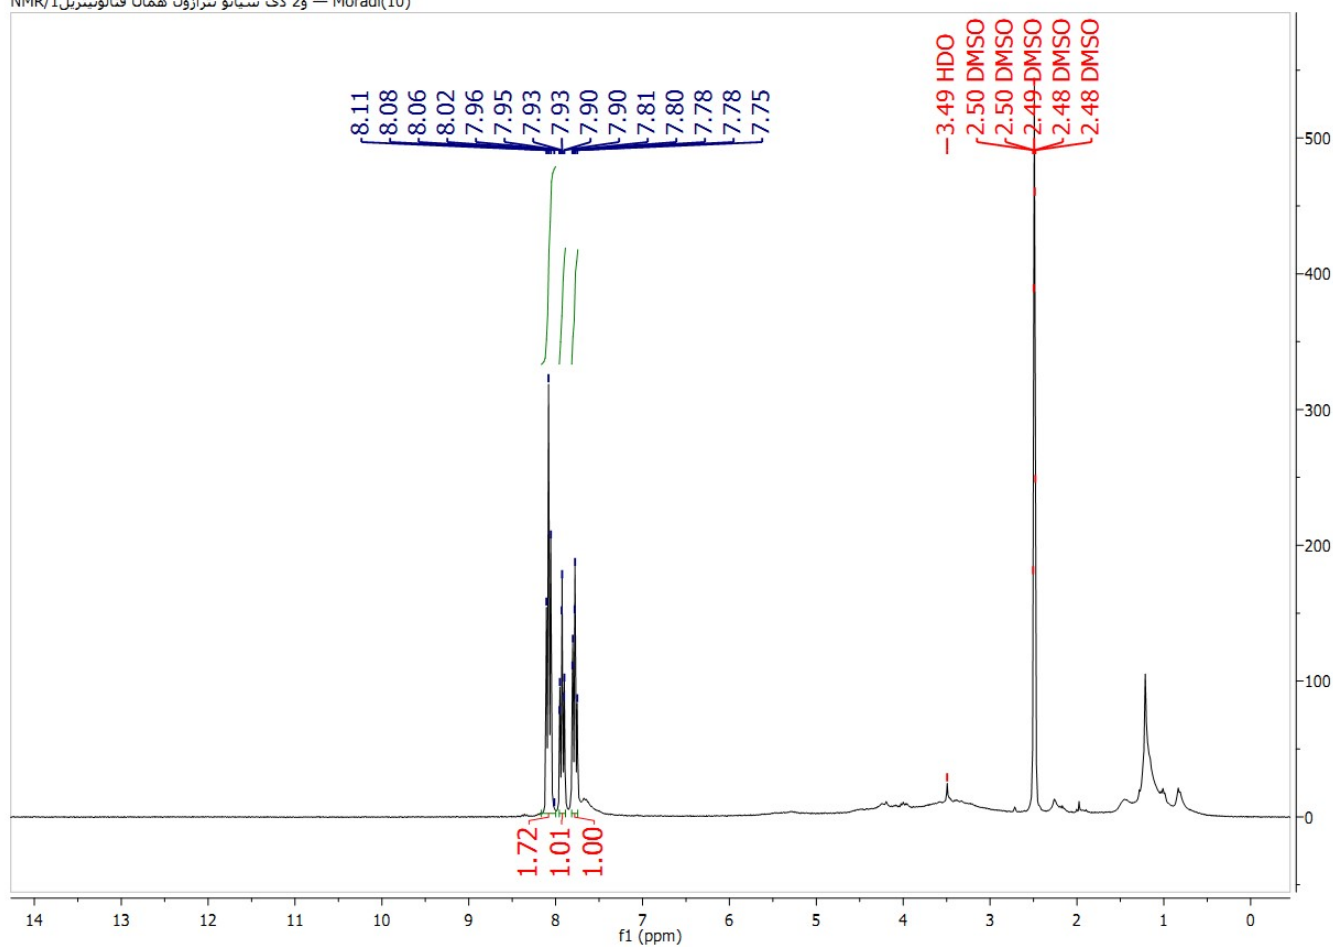

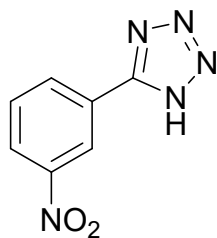

### 5-(3-nitrophenyl)-1H-tetrazole

$^1\text{H}$  NMR (400 MHz,  $\text{CDCl}_3$ ):  $\delta_{\text{H}}$  = 14.96 (br, 1H), 8.84-8.83 (t,  $J$  = 4 Hz, 1H), 8.49-8.39 (m, 2H), 7.93-7.88 (t,  $J$  = 8 Hz, 1H) ppm.

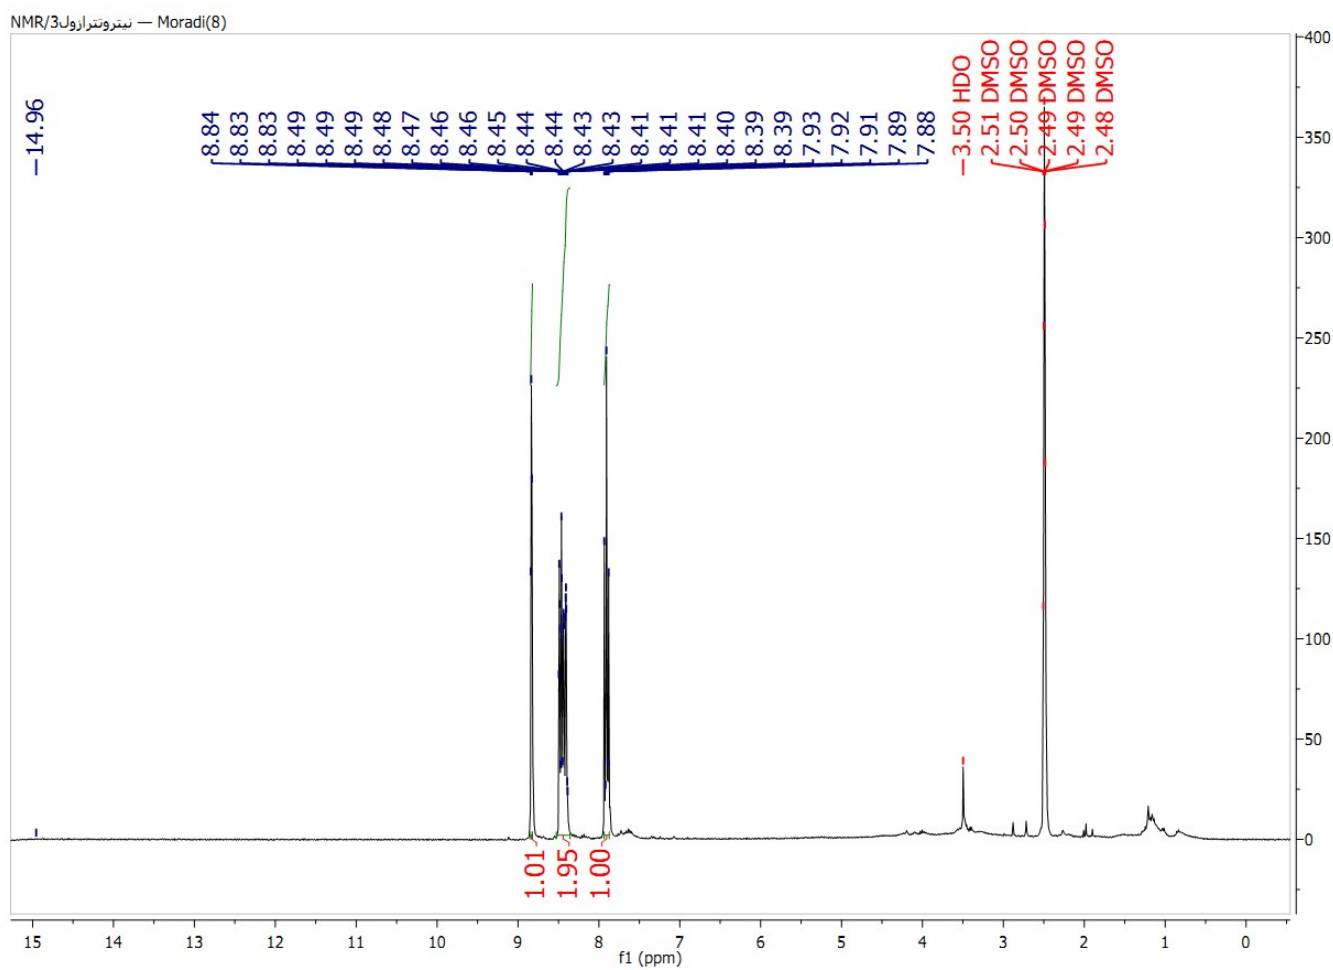

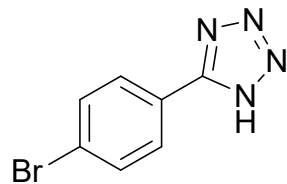

**5-(4-bromophenyl)-1H-tetrazole**

$^1\text{H}$  NMR (400 MHz,  $\text{CDCl}_3$ ):  $\delta_{\text{H}} = 7.98\text{-}7.96$  (d,  $J = 8$  Hz, 2H),  $7.84\text{-}7.82$  (d,  $J = 8$  Hz, 2H) ppm.

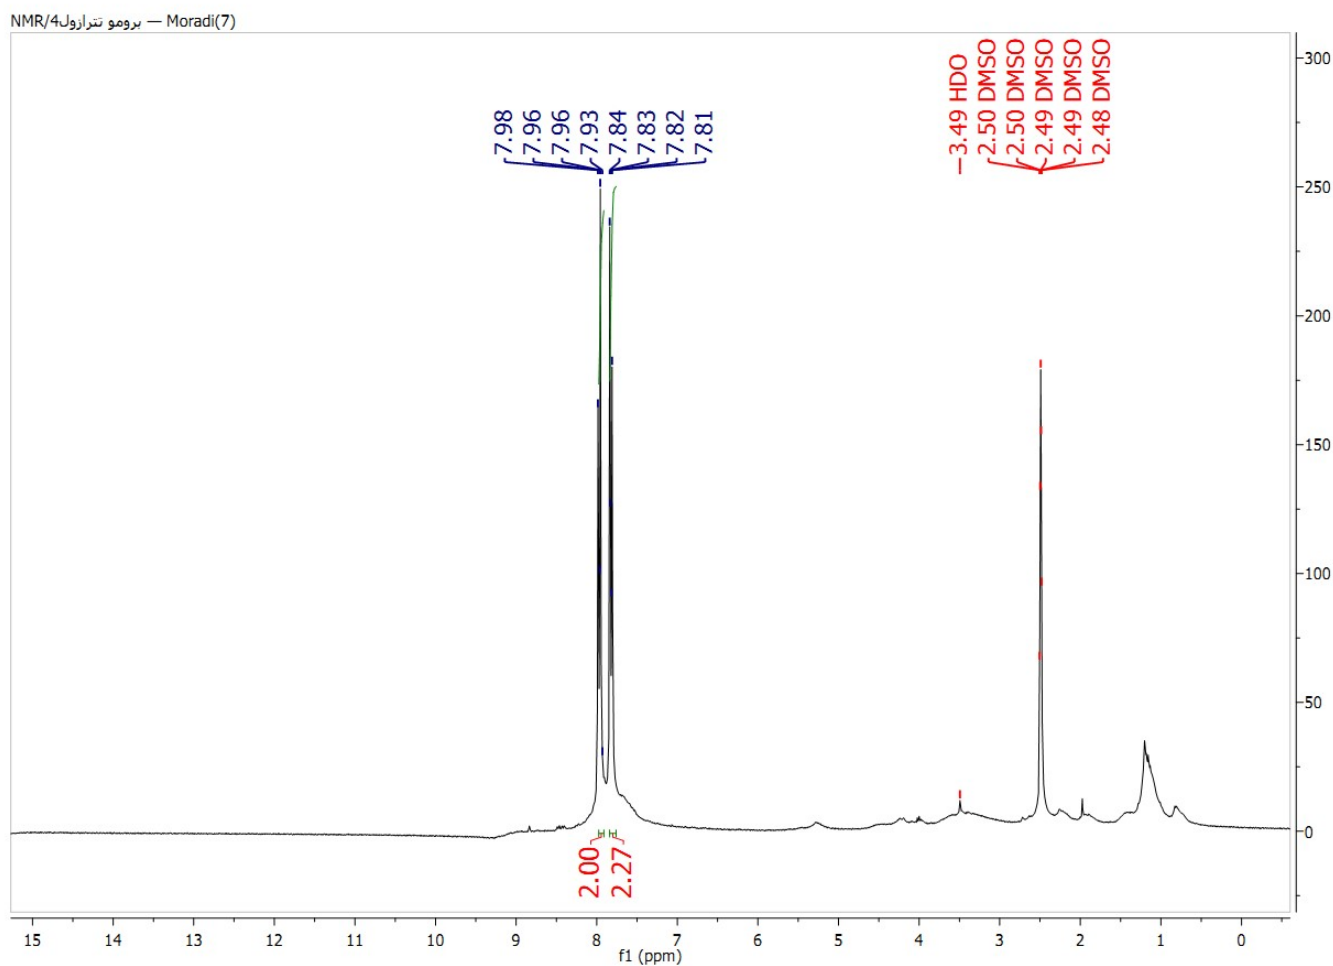

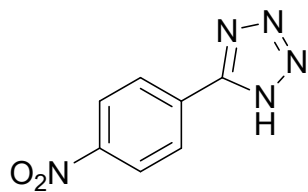

### 5-(4-nitrophenyl)-1H-tetrazole

$^1\text{H}$  NMR (400 MHz,  $\text{CDCl}_3$ ):  $\delta_{\text{H}} = 14.76$  (br, 1H), 8.45-8.41 (d,  $J = 12$  Hz, 2H), 8.30-8.27 (d,  $J = 12$  Hz, 2H) ppm.

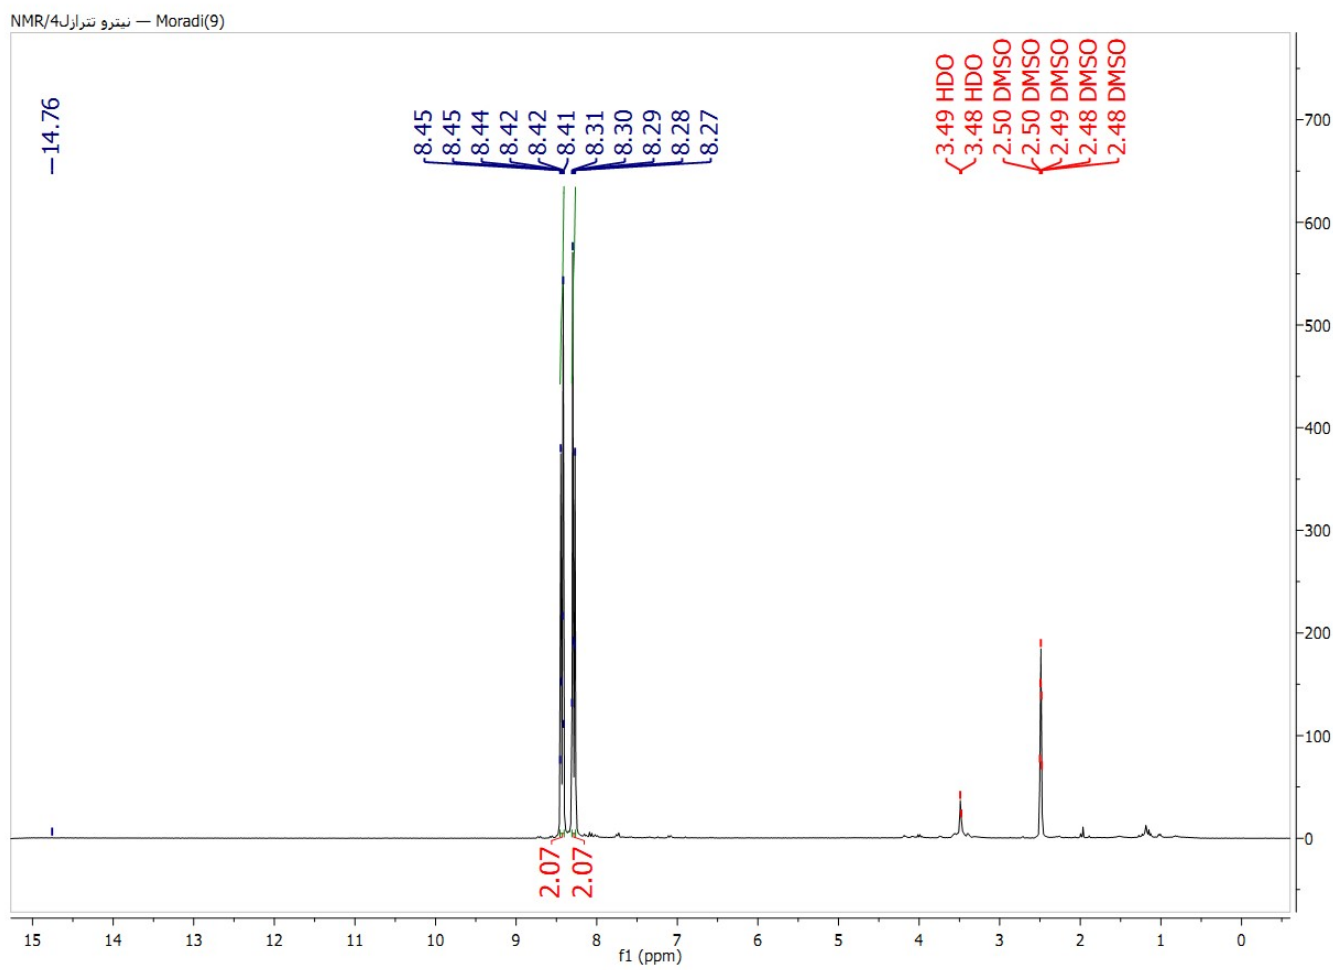

Supplement: d2ra04759d1.pdf [file d2ra04759d1.pdf]
